# Supplementary material
Source: publisher figshare collection journal article supplement (https://gsajournals.figshare.com/ndownloader/files/13153058)
Supplement: Supplementary file 1 [file 13153058]

## Sheet: SP FBF (25°C)
Term	Benjamini	Fold Enrichment	% of RNAs with term
GO:0009792~embryo development ending in birth or egg hatching	5.56197e-44	2.25509	49.6945
GO:0005634~nucleus	2.26718e-30	2.61379	30.7536
GO:0045132~meiotic chromosome segregation	8.04471e-24	8.54942	8.35031
GO:0000003~reproduction	2.99091e-22	2.13771	33.6049
GO:0007126~meiotic nuclear division	4.6799e-22	9.18243	7.33198
GO:0007049~cell cycle	1.35009e-17	7.14189	7.12831
GO:0007067~mitotic nuclear division	3.17078e-17	7.81335	6.51731
GO:0005515~protein binding	1.15951e-16	2.68093	18.5336
GO:0005694~chromosome	3.30291e-13	8.52549	4.88798
GO:0051301~cell division	2.94209e-13	6.25567	6.10998
GO:0005737~cytoplasm	3.2585e-13	2.19596	20.7739
GO:0051321~meiotic cell cycle	7.10543e-13	9.83474	4.27699
GO:0006974~cellular response to DNA damage stimulus	4.77063e-11	5.79943	5.49898
GO:0003676~nucleic acid binding	1.93358e-09	3.06827	9.5723
GO:0043186~P granule	2.36796e-09	8.81869	3.46232
GO:0002119~nematode larval development	3.56208e-09	1.76308	25.0509
GO:0007275~multicellular organism development	5.0304e-09	3.08082	8.9613
GO:0000794~condensed nuclear chromosome	5.11213e-09	12.8743	2.64766
GO:0000166~nucleotide binding	2.38087e-08	2.12667	15.2749
GO:0000776~kinetochore	1.9922e-08	11.4825	2.64766
GO:0040035~hermaphrodite genitalia development	3.27874e-08	2.36128	12.4236
GO:0005813~centrosome	2.22465e-08	8.91301	3.05499
GO:0006260~DNA replication	6.04336e-08	7.74714	3.25866
GO:0006915~apoptotic process	6.14422e-08	2.74344	9.36864
GO:0003730~mRNA 3'-UTR binding	1.69464e-07	10.0923	2.64766
GO:0000793~condensed chromosome	8.26824e-08	11.5345	2.44399
GO:0007276~gamete generation	1.85271e-07	5.39011	4.07332
GO:0003723~RNA binding	5.42273e-07	3.14027	6.92464
GO:0006281~DNA repair	4.50095e-07	4.83806	4.27699
GO:0008406~gonad development	5.70742e-07	2.98096	7.33198
GO:0007059~chromosome segregation	2.28702e-06	10.1369	2.24033
GO:0005524~ATP binding	6.09039e-06	1.96534	13.2383
GO:0005819~spindle	3.19013e-06	11.2693	2.03666
GO:0007283~spermatogenesis	7.95538e-06	7.00714	2.64766
GO:0030154~cell differentiation	9.19725e-06	3.69131	4.68432
GO:0048477~oogenesis	1.09308e-05	3.4009	5.09165
GO:0008017~microtubule binding	2.42864e-05	7.18106	2.44399
GO:0035188~hatching	1.9607e-05	6.40308	2.64766
GO:0000212~meiotic spindle organization	2.24466e-05	18.1794	1.42566
GO:0017148~negative regulation of translation	2.66957e-05	13.4436	1.62933
GO:0005874~microtubule	2.77176e-05	6.06933	2.64766
GO:0010171~body morphogenesis	5.77378e-05	2.13329	9.36864
GO:0051729~germline cell cycle switching, mitotic to meiotic cell cycle	7.34781e-05	6.98318	2.24033
GO:0000800~lateral element	8.99574e-05	32.681	1.01833
GO:0006417~regulation of translation	0.000168793	8.57027	1.83299
GO:0042006~masculinization of hermaphroditic germ-line	0.000177264	13.3315	1.42566
GO:0000785~chromatin	0.000137429	10.4579	1.62933
GO:0000932~cytoplasmic mRNA processing body	0.000145138	8.40369	1.83299
GO:0007052~mitotic spindle organization	0.000214746	5.52921	2.44399
GO:0004386~helicase activity	0.000434023	4.51842	2.85132
GO:0005654~nucleoplasm	0.000245342	6.6696	2.03666
GO:0051307~meiotic chromosome separation	0.000486274	15.5823	1.222
GO:0007130~synaptonemal complex assembly	0.000497385	23.8063	1.01833
GO:0040027~negative regulation of vulval development	0.000664695	2.85676	4.48065
GO:0006898~receptor-mediated endocytosis	0.000808188	1.87073	9.77597
GO:0051233~spindle midzone	0.000650025	14.0062	1.222
GO:0051257~meiotic spindle midzone assembly	0.00102869	20.4054	1.01833
GO:0040025~vulval development	0.00142094	3.60095	3.05499
GO:0016246~RNA interference	0.00141659	3.23766	3.46232
GO:0030953~astral microtubule organization	0.00183773	17.8547	1.01833
GO:0051256~mitotic spindle midzone assembly	0.00183773	17.8547	1.01833
GO:0000070~mitotic sister chromatid segregation	0.00207498	8.69448	1.42566
GO:0006310~DNA recombination	0.00207498	8.69448	1.42566
GO:0000801~central element	0.00163656	32.681	0.814664
GO:0003677~DNA binding	0.00451544	1.75061	9.97963
GO:0007064~mitotic sister chromatid cohesion	0.00305008	15.8709	1.01833
GO:0016787~hydrolase activity	0.00573171	1.73867	9.77597
GO:0010501~RNA secondary structure unwinding	0.00386304	6.34835	1.62933
GO:0017151~DEAD/H-box RNA helicase binding	0.00619403	10.138	1.222
GO:0008278~cohesin complex	0.00375977	26.1448	0.814664
GO:0005643~nuclear pore	0.00561713	6.93234	1.42566
GO:0005871~kinesin complex	0.00550681	8.91301	1.222
GO:0000795~synaptonemal complex	0.00624003	21.7874	0.814664
GO:0000777~condensed chromosome kinetochore	0.00620676	8.52549	1.222
GO:0005815~microtubule organizing center	0.00729495	8.17026	1.222
GO:0070090~metaphase plate	0.00926879	18.6749	0.814664

## Sheet: OO FBF (25°C)
Term	Benjamini	Fold Enrichment	% of RNAs with term
GO:0009792~embryo development ending in birth or egg hatching	3.18756e-50	2.34403	52.4896
GO:0000003~reproduction	1.11654e-23	2.18194	34.8548
GO:0005634~nucleus	2.02445e-22	2.34913	29.0456
GO:0005515~protein binding	3.88085e-19	2.78183	20.1245
GO:0007067~mitotic nuclear division	4.73759e-19	8.32213	7.05394
GO:0005737~cytoplasm	7.78632e-18	2.37911	23.6515
GO:0007049~cell cycle	1.60942e-17	7.15948	7.26141
GO:0051301~cell division	5.60586e-16	6.89819	6.84647
GO:0007126~meiotic nuclear division	9.90319e-14	7.15948	5.80913
GO:0051321~meiotic cell cycle	7.88702e-13	9.85896	4.35685
GO:0043186~P granule	2.5151e-12	10.057	4.14938
GO:0045132~meiotic chromosome segregation	1.50118e-11	5.85301	5.80913
GO:0048477~oogenesis	2.24221e-11	4.63662	7.05394
GO:0005694~chromosome	3.59873e-11	7.57557	4.56432
GO:0006915~apoptotic process	1.84668e-10	3.04913	10.5809
GO:0002119~nematode larval development	5.73145e-10	1.79616	25.9336
GO:0007275~multicellular organism development	4.43672e-09	3.0884	9.12863
GO:0007059~chromosome segregation	1.23771e-08	12.0095	2.6971
GO:0005813~centrosome	4.73895e-08	8.63991	3.11203
GO:0003730~mRNA 3'-UTR binding	4.6783e-07	9.82436	2.6971
GO:0008406~gonad development	1.93336e-07	3.07131	7.67635
GO:0000793~condensed chromosome	1.54866e-07	11.1811	2.48963
GO:0040035~hermaphrodite genitalia development	4.65002e-07	2.25068	12.0332
GO:0006260~DNA replication	4.70874e-07	7.28083	3.11203
GO:0005819~spindle	3.40936e-07	12.0164	2.28216
GO:0000166~nucleotide binding	1.26864e-06	1.9874	14.9378
GO:0005874~microtubule	8.56248e-07	6.7885	3.11203
GO:0000794~condensed nuclear chromosome	1.09495e-06	10.5599	2.28216
GO:0008017~microtubule binding	6.17368e-06	7.57295	2.6971
GO:0000932~cytoplasmic mRNA processing body	1.8476e-06	9.95647	2.28216
GO:0000776~kinetochore	3.01276e-06	9.41828	2.28216
GO:0006974~cellular response to DNA damage stimulus	7.32318e-06	4.30646	4.14938
GO:0040027~negative regulation of vulval development	7.91171e-06	3.38448	5.39419
GO:0005938~cell cortex	4.60996e-06	5.79506	3.11203
GO:0006417~regulation of translation	2.07674e-05	9.54598	2.07469
GO:0000212~meiotic spindle organization	2.62303e-05	18.2241	1.45228
GO:0007276~gamete generation	2.65659e-05	4.59288	3.52697
GO:0017148~negative regulation of translation	2.95304e-05	13.4767	1.65975
GO:0051729~germline cell cycle switching, mitotic to meiotic cell cycle	8.37616e-05	7.00038	2.28216
GO:0000910~cytokinesis	8.37616e-05	7.00038	2.28216
GO:0007281~germ cell development	0.000170096	3.30438	4.35685
GO:0003723~RNA binding	0.000375196	2.60736	6.0166
GO:0006281~DNA repair	0.000185308	3.92617	3.52697
GO:0003676~nucleic acid binding	0.000350451	2.28777	7.46888
GO:0042006~masculinization of hermaphroditic germ-line	0.000194039	13.3644	1.45228
GO:0005524~ATP binding	0.000305604	1.79543	12.6556
GO:0030154~cell differentiation	0.000395155	3.21775	4.14938
GO:0040025~vulval development	0.000429525	3.85048	3.3195
GO:0006898~receptor-mediated endocytosis	0.000426181	1.9144	10.166
GO:0005654~nucleoplasm	0.000343064	6.46524	2.07469
GO:0051307~meiotic chromosome separation	0.000495389	15.6207	1.24481
GO:0001556~oocyte maturation	0.000552081	11.137	1.45228
GO:0035188~hatching	0.000656905	5.43133	2.28216
GO:0051257~meiotic spindle midzone assembly	0.00108215	20.4557	1.03734
GO:0051233~spindle midzone	0.000818915	13.577	1.24481
GO:0007052~mitotic spindle organization	0.00112492	5.08092	2.28216
GO:0005815~microtubule organizing center	0.0012464	9.2399	1.45228
GO:0030261~chromosome condensation	0.00198364	17.8987	1.03734
GO:0030953~astral microtubule organization	0.00198364	17.8987	1.03734
GO:0051256~mitotic spindle midzone assembly	0.00198364	17.8987	1.03734
GO:0000785~chromatin	0.0014969	8.87031	1.45228
GO:0006310~DNA recombination	0.00222746	8.71589	1.45228
GO:0000281~mitotic cytokinesis	0.00222746	8.71589	1.45228
GO:0005829~cytosol	0.00150636	2.47659	4.97925
GO:0048599~oocyte development	0.00280471	8.35273	1.45228
GO:0032154~cleavage furrow	0.00181998	11.1811	1.24481
GO:0007064~mitotic sister chromatid cohesion	0.00319647	15.91	1.03734
GO:0017151~DEAD/H-box RNA helicase binding	0.00979489	9.86882	1.24481
GO:0008278~cohesin complex	0.00373628	25.3437	0.829876
GO:0000800~lateral element	0.00373628	25.3437	0.829876
GO:0007283~spermatogenesis	0.00885099	4.86304	1.86722
GO:0005643~nuclear pore	0.00604208	6.71993	1.45228
GO:0005871~kinesin complex	0.00582025	8.63991	1.24481
GO:0000777~condensed chromosome kinetochore	0.00691412	8.26426	1.24481

## Sheet: OO FBF-1 (20°C)
Term	Benjamini	Fold Enrichment	% of RNAs with term
GO:0007049~cell cycle	5.39458e-35	5.61405	16.1826
GO:0022402~cell cycle process	1.21858e-31	5.60421	14.7303
GO:0022403~cell cycle phase	2.66878e-25	5.60582	12.0332
GO:0000279~M phase	6.56693e-24	5.47961	11.6183
GO:0009792~embryonic development ending in birth or egg hatching	8.99748e-24	1.82845	42.1162
GO:0007059~chromosome segregation	2.61545e-17	6.1213	7.88382
GO:0007126~meiosis	3.88677e-17	5.845	8.09129
GO:0051327~M phase of meiotic cell cycle	4.29906e-17	5.80824	8.09129
GO:0051321~meiotic cell cycle	1.49752e-16	5.59703	8.09129
GO:0051301~cell division	2.67323e-15	5.01159	8.29876
GO:0000278~mitotic cell cycle	8.32667e-15	5.79217	7.05394
GO:0051276~chromosome organization	8.50764e-13	5.37413	6.639
GO:0000910~cytokinesis	2.06135e-12	5.59364	6.22407
GO:0005694~chromosome	2.72253e-11	10.0918	3.94191
GO:0019953~sexual reproduction	3.28333e-11	3.98155	7.88382
GO:0007067~mitosis	3.43937e-11	7.76992	4.35685
GO:0000087~M phase of mitotic cell cycle	4.48113e-11	7.65038	4.35685
GO:0000280~nuclear division	4.48113e-11	7.65038	4.35685
GO:0048285~organelle fission	5.8223e-11	7.53447	4.35685
GO:0045132~meiotic chromosome segregation	1.21011e-09	5.04651	5.39419
GO:0043232~intracellular non-membrane-bounded organelle	6.5748e-09	3.6694	6.84647
GO:0043228~non-membrane-bounded organelle	6.5748e-09	3.6694	6.84647
GO:0007276~gamete generation	5.8073e-09	4.08272	6.22407
GO:0003006~reproductive developmental process	1.57608e-08	2.10867	15.3527
GO:0006259~DNA metabolic process	3.20472e-08	4.17878	5.60166
GO:0000226~microtubule cytoskeleton organization	3.88261e-07	4.73595	4.35685
GO:0000070~mitotic sister chromatid segregation	1.48402e-06	11.8399	2.07469
GO:0051729~germline cell cycle switching, mitotic to meiotic cell cycle	1.52205e-06	10.0184	2.28216
GO:0051728~cell cycle switching, mitotic to meiotic cell cycle	1.52205e-06	10.0184	2.28216
GO:0060184~cell cycle switching	1.52205e-06	10.0184	2.28216
GO:0006974~response to DNA damage stimulus	4.29063e-06	5.09564	3.52697
GO:0007017~microtubule-based process	5.71948e-06	3.705	4.77178
GO:0051726~regulation of cell cycle	7.30019e-06	5.63804	3.11203
GO:0007127~meiosis I	8.04776e-06	11.8399	1.86722
GO:0000819~sister chromatid segregation	7.88725e-06	9.86657	2.07469
GO:0051640~organelle localization	1.22475e-05	4.68088	3.52697
GO:0006281~DNA repair	2.51428e-05	5.07423	3.11203
GO:0048609~reproductive process in a multicellular organism	2.53308e-05	2.23787	8.92116
GO:0044430~cytoskeletal part	3.85998e-05	6.18683	2.6971
GO:0032504~multicellular organism reproduction	2.61023e-05	2.23296	8.92116
GO:0007051~spindle organization	3.2837e-05	4.93328	3.11203
GO:0051656~establishment of organelle localization	3.55787e-05	4.56477	3.3195
GO:0033554~cellular response to stress	4.54622e-05	3.98351	3.73444
GO:0002009~morphogenesis of an epithelium	6.69347e-05	2.43236	7.05394
GO:0060429~epithelium development	9.04938e-05	2.39617	7.05394
GO:0007010~cytoskeleton organization	0.000108395	3.1573	4.56432
GO:0040028~regulation of vulval development	0.000106593	3.27155	4.35685
GO:0048580~regulation of post-embryonic development	0.000106593	3.27155	4.35685
GO:0018992~germ-line sex determination	0.000117535	7.17568	2.07469
GO:0007548~sex differentiation	0.000131999	1.81207	12.2407
GO:0048729~tissue morphogenesis	0.000142876	2.33366	7.05394
GO:0015630~microtubule cytoskeleton	0.000255808	7.16732	2.07469
GO:0048806~genitalia development	0.000234404	1.83722	11.2033
GO:0007281~germ cell development	0.000257937	5.16649	2.48963
GO:0040021~hermaphrodite germ-line sex determination	0.00031972	7.34889	1.86722
GO:0007292~female gamete generation	0.000318132	3.56244	3.52697
GO:0007530~sex determination	0.000352106	6.23152	2.07469
GO:0048477~oogenesis	0.000445987	3.64304	3.3195
GO:0044427~chromosomal part	0.000900651	6.95323	1.86722
GO:0032559~adenyl ribonucleotide binding	0.005589	1.72365	11.4108
GO:0040035~hermaphrodite genitalia development	0.00070038	1.78456	10.7884
GO:0005874~microtubule	0.00109682	7.93183	1.65975
GO:0010608~posttranscriptional regulation of gene expression	0.000952085	4.91467	2.28216
GO:0001883~purine nucleoside binding	0.00912279	1.6403	11.6183
GO:0010564~regulation of cell cycle process	0.00231053	5.60836	1.86722
GO:0006260~DNA replication	0.00235665	4.41487	2.28216
GO:0001882~nucleoside binding	0.00879293	1.62901	11.6183
GO:0043933~macromolecular complex subunit organization	0.00239071	3.13121	3.3195
GO:0032555~purine ribonucleotide binding	0.00817103	1.58486	12.4481
GO:0032553~ribonucleotide binding	0.00817103	1.58486	12.4481
GO:0004386~helicase activity	0.00801347	3.94454	2.48963
GO:0000166~nucleotide binding	0.00995296	1.49109	14.3154
GO:0048610~reproductive cellular process	0.00718887	3.55196	2.48963
GO:0007129~synapsis	0.00773613	11.8399	1.03734
GO:0070192~chromosome organization involved in meiosis	0.00773613	11.8399	1.03734
GO:0005856~cytoskeleton	0.00877306	3.29087	2.6971
GO:0048232~male gamete generation	0.00859459	6.37532	1.45228
GO:0007283~spermatogenesis	0.00859459	6.37532	1.45228
GO:0009791~post-embryonic development	0.00940299	1.34438	20.9544
GO:0040027~negative regulation of vulval development	0.00945284	3.01379	2.90456
GO:0048581~negative regulation of post-embryonic development	0.00945284	3.01379	2.90456
GO:0007062~sister chromatid cohesion	0.00945846	18.9438	0.829876
GO:0051382~kinetochore assembly	0.00945846	18.9438	0.829876
GO:0034508~centromere complex assembly	0.00945846	18.9438	0.829876

## Sheet: OO FBF-2 (20°C)
Term	Benjamini	Fold Enrichment	% of RNAs with term
GO:0009792~embryo development ending in birth or egg hatching	4.04435e-57	2.50433	57.5758
GO:0000003~reproduction	1.35062e-34	2.5157	41.2587
GO:0002119~nematode larval development	1.5975e-18	2.17003	32.1678
GO:0006915~apoptotic process	3.23463e-16	3.79478	13.5198
GO:0007067~mitotic nuclear division	3.0087e-14	7.50008	6.52681
GO:0007126~meiotic nuclear division	9.01945e-13	7.27527	6.06061
GO:0005634~nucleus	2.3781e-12	2.038	26.3403
GO:0007049~cell cycle	2.95275e-12	6.26792	6.52681
GO:0040035~hermaphrodite genitalia development	2.67764e-12	2.80273	15.3846
GO:0005737~cytoplasm	4.57123e-12	2.17585	22.6107
GO:0043186~P granule	9.83824e-12	10.2693	4.4289
GO:0005515~protein binding	2.05631e-09	2.2985	17.2494
GO:0051301~cell division	5.6516e-10	5.71891	5.82751
GO:0003723~RNA binding	4.87145e-09	3.60296	8.62471
GO:0030529~intracellular ribonucleoprotein complex	2.1428e-09	5.59741	5.59441
GO:0008406~gonad development	2.03104e-08	3.36106	8.62471
GO:0045132~meiotic chromosome segregation	2.03877e-08	5.2614	5.36131
GO:0005813~centrosome	2.0982e-07	8.6675	3.2634
GO:0048477~oogenesis	7.10989e-07	3.88014	6.06061
GO:0003730~mRNA 3'-UTR binding	1.63482e-06	9.82195	2.7972
GO:0001556~oocyte maturation	1.68158e-06	15.6698	2.0979
GO:0051321~meiotic cell cycle	2.21363e-06	7.1927	3.2634
GO:0006898~receptor-mediated endocytosis	1.01713e-05	2.18052	11.8881
GO:0006260~DNA replication	1.10857e-05	6.90534	3.0303
GO:0007275~multicellular organism development	1.06277e-05	2.68845	8.15851
GO:0005694~chromosome	1.64382e-05	5.55178	3.4965
GO:0048599~oocyte development	1.72576e-05	11.7524	2.0979
GO:0005840~ribosome	2.79177e-05	4.09473	4.4289
GO:0007276~gamete generation	4.33445e-05	4.73051	3.7296
GO:0005819~spindle	3.70483e-05	10.5675	2.0979
GO:0005622~intracellular	3.75906e-05	2.6928	7.22611
GO:0000166~nucleotide binding	0.000128818	1.85353	14.4522
GO:0006412~translation	9.54445e-05	3.01343	5.82751
GO:0010468~regulation of gene expression	9.95509e-05	9.40189	2.0979
GO:0000793~condensed chromosome	0.000110313	9.01347	2.0979
GO:0032154~cleavage furrow	0.000122761	14.021	1.6317
GO:0022627~cytosolic small ribosomal subunit	0.000145574	8.51272	2.0979
GO:0003676~nucleic acid binding	0.00117803	2.27133	7.69231
GO:0007281~germ cell development	0.000609383	3.27172	4.4289
GO:0006974~cellular response to DNA damage stimulus	0.000614293	3.77018	3.7296
GO:0008017~microtubule binding	0.00108814	6.30924	2.331
GO:0005938~cell cortex	0.00045976	4.98306	2.7972
GO:0006417~regulation of translation	0.000951474	8.35723	1.8648
GO:0007059~chromosome segregation	0.00114776	8.08764	1.8648
GO:0040011~locomotion	0.00111917	1.60602	16.7832
GO:0030154~cell differentiation	0.00131628	3.16918	4.1958
GO:0000932~cytoplasmic mRNA processing body	0.000976164	7.78306	1.8648
GO:0000281~mitotic cytokinesis	0.00153598	9.53815	1.6317
GO:0003735~structural constituent of ribosome	0.00351054	3.04535	4.1958
GO:0007052~mitotic spindle organization	0.00323082	5.05478	2.331
GO:0010171~body morphogenesis	0.00327033	1.93329	8.85781
GO:0004386~helicase activity	0.00567368	4.08328	2.7972
GO:0006281~DNA repair	0.00341231	3.53834	3.2634
GO:0005874~microtubule	0.00303314	4.86441	2.331
GO:0061158~3'-UTR-mediated mRNA destabilization	0.0040799	10.4465	1.3986
GO:0040027~negative regulation of vulval development	0.00477576	2.7066	4.4289
GO:0000800~lateral element	0.0035362	27.2407	0.932401
GO:0000794~condensed nuclear chromosome	0.00477432	7.22292	1.6317
GO:0000910~cytokinesis	0.00988758	5.57149	1.8648
GO:0005654~nucleoplasm	0.00680736	5.55933	1.8648

## Sheet: Block II
Term	Benjamini	Fold Enrichment	% of RNAs with term
GO:0009792~embryo development ending in birth or egg hatching	1.06217e-53	2.33804	53.8767
GO:0000003~reproduction	7.14682e-27	2.21322	36.3817
GO:0005634~nucleus	1.20016e-26	2.44166	30.2187
GO:0005515~protein binding	8.16073e-23	2.88961	21.2724
GO:0007049~cell cycle	2.47237e-20	7.42878	7.75348
GO:0005737~cytoplasm	1.14521e-18	2.37749	23.6581
GO:0051301~cell division	8.34396e-18	7.0075	7.15706
GO:0007067~mitotic nuclear division	3.03379e-15	7.06573	6.16302
GO:0045132~meiotic chromosome segregation	4.07646e-15	6.42354	6.56064
GO:0007126~meiotic nuclear division	5.48228e-13	6.66686	5.5666
GO:0006915~apoptotic process	2.42477e-11	3.06202	10.9344
GO:0051321~meiotic cell cycle	3.33302e-11	8.74342	3.97614
GO:0040035~hermaphrodite genitalia development	7.01549e-11	2.52943	13.9165
GO:0005938~cell cortex	9.86009e-11	7.76693	4.17495
GO:0007275~multicellular organism development	3.33481e-10	3.13734	9.54274
GO:0008406~gonad development	2.93067e-09	3.24647	8.3499
GO:0005694~chromosome	6.25434e-09	6.59304	3.97614
GO:0002119~nematode larval development	9.91827e-09	1.71271	25.4473
GO:0006974~cellular response to DNA damage stimulus	4.02761e-08	4.81217	4.77137
GO:0048477~oogenesis	5.7549e-08	3.80963	5.96421
GO:0008017~microtubule binding	2.32414e-07	8.2283	2.98211
GO:0005813~centrosome	8.08533e-08	8.27127	2.98211
GO:0000794~condensed nuclear chromosome	1.64807e-07	11.0284	2.38569
GO:0003730~mRNA 3'-UTR binding	6.09417e-07	9.25128	2.58449
GO:0043186~P granule	3.90334e-07	7.22095	2.98211
GO:0042006~masculinization of hermaphroditic germ-line	9.46391e-07	16.0005	1.78926
GO:0000212~meiotic spindle organization	1.37233e-06	19.3945	1.59046
GO:0000166~nucleotide binding	2.43674e-06	1.92346	14.7117
GO:0005874~microtubule	1.43183e-06	6.49886	2.98211
GO:0000793~condensed chromosome	2.19982e-06	9.812	2.18688
GO:0010171~body morphogenesis	7.66446e-06	2.20786	10.1392
GO:0040027~negative regulation of vulval development	8.47329e-06	3.27282	5.36779
GO:0000776~kinetochore	4.81502e-06	9.01643	2.18688
GO:0030154~cell differentiation	3.30025e-05	3.44579	4.57256
GO:0035188~hatching	4.72902e-05	5.97718	2.58449
GO:0000932~cytoplasmic mRNA processing body	2.86277e-05	8.66514	1.98807
GO:0006898~receptor-mediated endocytosis	9.59788e-05	1.96459	10.7356
GO:0005819~spindle	5.76863e-05	9.41214	1.78926
GO:0051729~germline cell cycle switching, mitotic to meiotic cell cycle	0.000170591	6.51871	2.18688
GO:0005815~microtubule organizing center	0.000150287	10.1093	1.59046
GO:0040025~vulval development	0.000298932	3.80963	3.37972
GO:0006260~DNA replication	0.00032206	5.42388	2.38569
GO:0006417~regulation of translation	0.000322651	8.00023	1.78926
GO:0005524~ATP binding	0.000736712	1.74613	12.5249
GO:0007059~chromosome segregation	0.000405187	7.74216	1.78926
GO:0006281~DNA repair	0.000435956	3.65602	3.37972
GO:0017151~DEAD/H-box RNA helicase binding	0.00130961	10.842	1.39165
GO:0001556~oocyte maturation	0.000950903	10.3707	1.39165
GO:0007281~germ cell development	0.00139761	2.93049	3.97614
GO:0005871~kinesin complex	0.000964136	9.64982	1.39165
GO:0051257~meiotic spindle midzone assembly	0.00164014	19.0482	0.994036
GO:0010468~regulation of gene expression	0.00242022	7.11131	1.59046
GO:0000922~spindle pole	0.00188086	11.373	1.19284
GO:0000281~mitotic cytokinesis	0.0038694	8.11617	1.39165
GO:0032154~cleavage furrow	0.00243038	10.704	1.19284
GO:0005654~nucleoplasm	0.00240458	5.57045	1.78926
GO:0016779~nucleotidyltransferase activity	0.00808255	5.51105	1.78926
GO:0005829~cytosol	0.00262363	2.37092	4.77137
GO:0007064~mitotic sister chromatid cohesion	0.00506184	14.8152	0.994036
GO:0035046~pronuclear migration	0.00491921	4.76204	1.98807
GO:0017148~negative regulation of translation	0.00695393	9.41203	1.19284
GO:0008278~cohesin complex	0.00411046	24.2624	0.795229
GO:0040022~feminization of hermaphroditic germ-line	0.00841742	5.76593	1.59046
GO:0007052~mitotic spindle organization	0.00992803	4.3012	1.98807
GO:0008340~determination of adult lifespan	0.0097011	1.58474	11.5308
GO:0043652~engulfment of apoptotic cell	0.00954654	3.59561	2.38569
GO:0005643~nuclear pore	0.00735647	6.43321	1.39165

## Sheet: Block III
Term	Benjamini	Fold Enrichment	% of RNAs with term
GO:0048477~oogenesis	1.18983e-06	23.3123	38.0952
GO:0043186~P granule	5.39749e-05	50.1455	23.8095
GO:0000003~reproduction	0.000486443	3.60785	61.9048
GO:0007276~gamete generation	0.000470481	28.8654	23.8095
GO:0005737~cytoplasm	0.00162644	4.16227	47.619
GO:0017148~negative regulation of translation	0.00590472	107.991	14.2857
GO:0009792~embryo development ending in birth or egg hatching	0.00663816	2.5737	61.9048
GO:0006915~apoptotic process	0.00825469	7.66531	28.5714
